# Supplementary material for: Arterial and aortic valve calcification inversely correlates with osteoporotic bone remodelling: a role for inflammation
Source: PubMed Central journal article supplement — Eur Heart J. 2010 Jul 2;31(16):1975–84. doi: 10.1093/eurheartj/ehq237 (PMC2921509; doi:10.1093/eurheartj/ehq237), 2010-07-02

## **Supplemental Figure Legends**

**Supplemental Figure 1.** (A) Co-localization of osteogenic signal (red fluorescence, left) with osteoblast-like cells (alkaline phosphatase activity, ALP, right) in the tissue section through the area of active mineralization in atherosclerotic lesion of mouse injected with Osteosense680. (B) Co-localization of fluorescence NIR nanoparticle (red fluorescence, left) with macrophages shown as mac-3-positive cells (right) in atherosclerotic lesion. Bar=50um.

**Supplemental Figure 2.** Calcification increased in aortas of CRD apoE<sup>-/-</sup> mice. Macroscopic fluorescence reflectance imaging of calcification yielded strong Osteosense680-derived osteogenic signal in atherosclerotic mice with CRD. Bar=1cm.

**Supplemental Figure 3.** (A) Carotid arteries and (B) aortic valves showed notable increase in alkaline phosphatase activity (red reaction product) in apoE<sup>-/-</sup> and CRD apoE<sup>-/-</sup> mice compared to wild type mice. Bar=50um.

**Supplemental Figure 4.** Micro-CT showed no significant changes in bone volume fraction between three groups.

**Supplemental Figure 5.** (A) Carotid arteries (bar=50um) and (B) aortic valves (bar=100um) demonstrate increase in macrophage accumulation (mac-3 staining, brown-red reaction product) particularly in CRD apoE<sup>-/-</sup> mice. Note higher numbers of macrophages in the aortic valves and myocardium in CRD apoE<sup>-/-</sup> mice compared to apoE<sup>-/-</sup> and WT mice.

# Suppl Figure 1

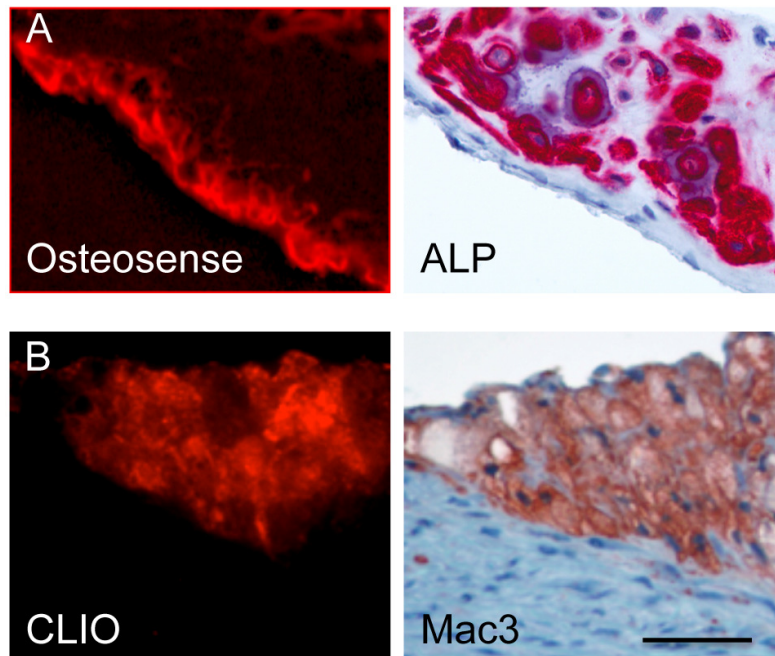

Suppl Figure 2

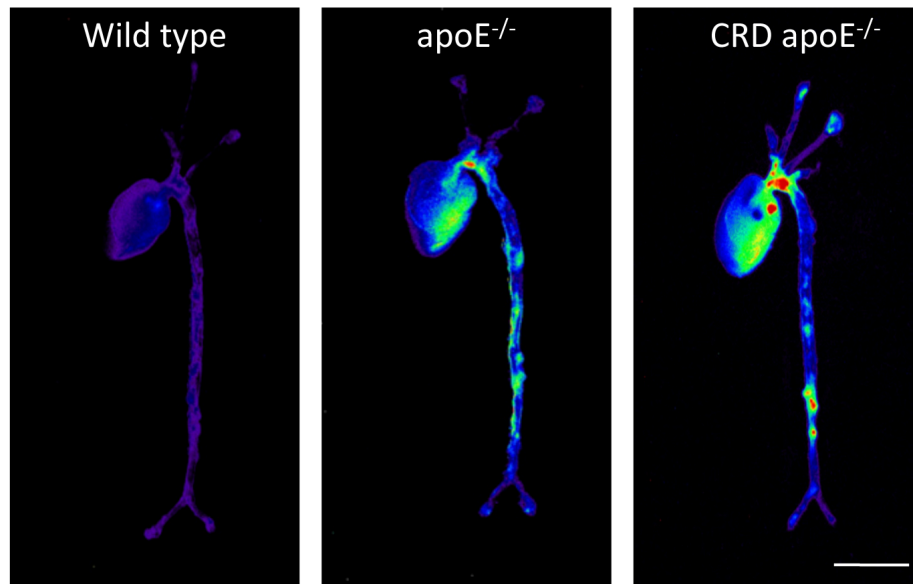

# Suppl Figure 3

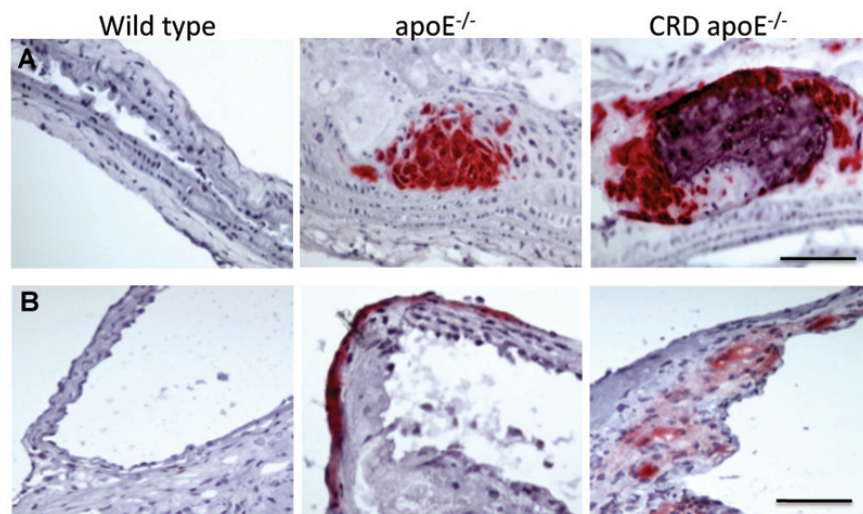

Suppl Figure 4

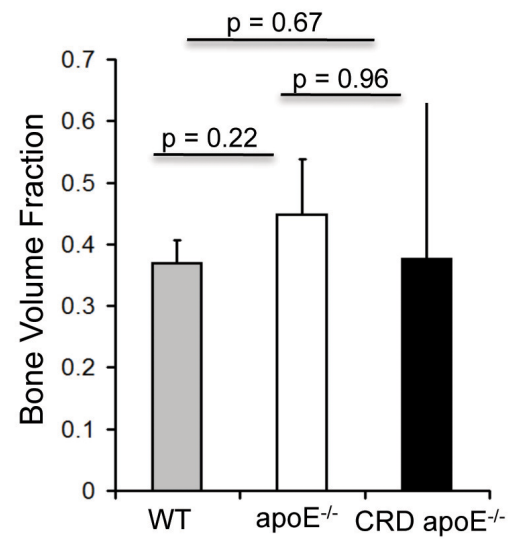

# Suppl Figure 5

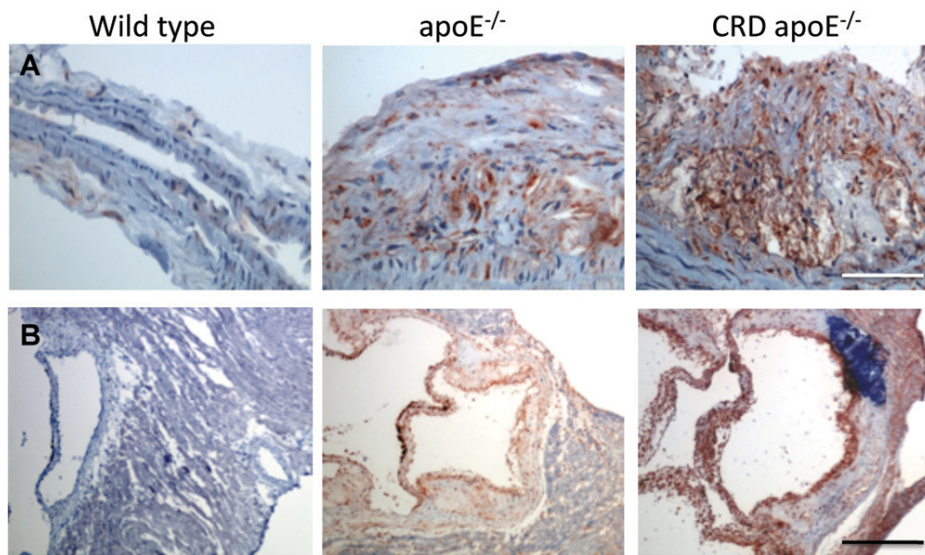

Supplement: supp_ehq237_ehq237supp_figs.pdf [file supp_ehq237_ehq237supp_figs.pdf]
